# Supplementary material for: SLC2A2 (GLUT2) as a novel prognostic factor for hepatocellular carcinoma
Source: PubMed Central journal article supplement (PMC5620264; doi:10.18632/oncotarget.20266), 2017-08-14
Supplement: oncotarget-08-68381-s001.pdf [file oncotarget-08-68381-s001.pdf]

# SLC2A2 (GLUT2) as a novel prognostic factor for hepatocellular carcinoma

## SUPPLEMENTARY MATERIALS

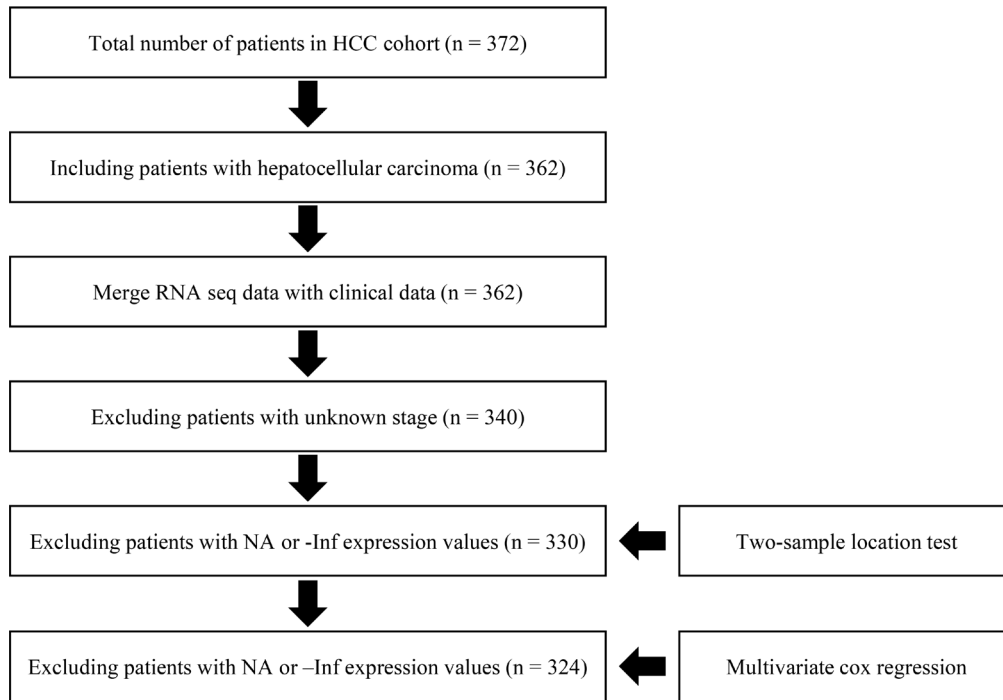

Supplementary Figure 1: Flow diagram of patient inclusion/exclusion criteria.

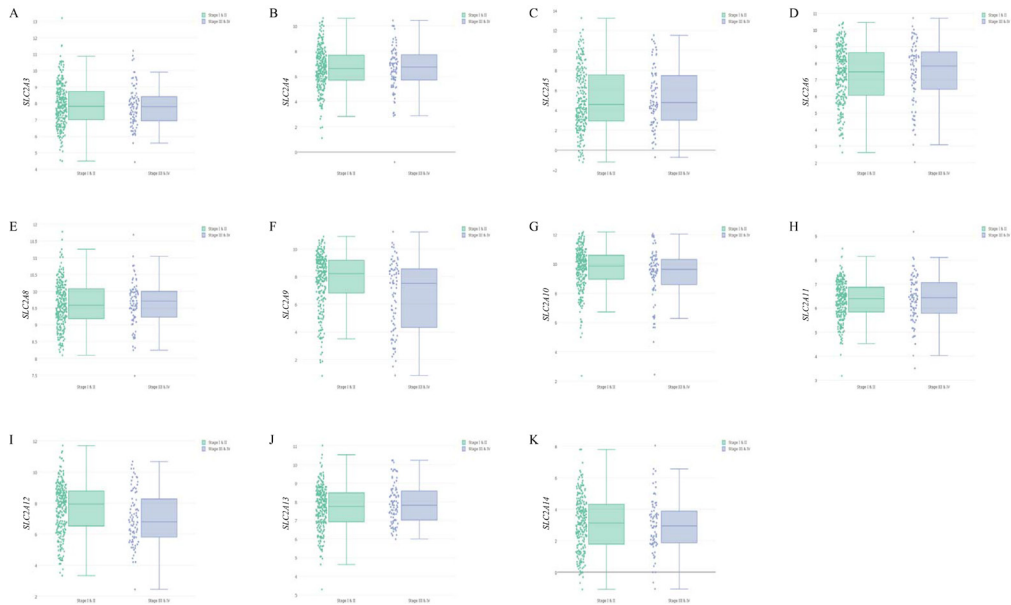

**Supplementary Figure 2: Association of gene expression (SLC2A family) with clinical stages.** Relations between clinical stages and the expression levels of genes were examined using boxplots and scatterplots. Central lines in boxes represent medians, boxes show interquartile ranges (IQR), and error bars show the full range of values, excluding outliers defined as being more than  $\pm 1.5$ IQR outside boxes. Scatter plots represent raw data.

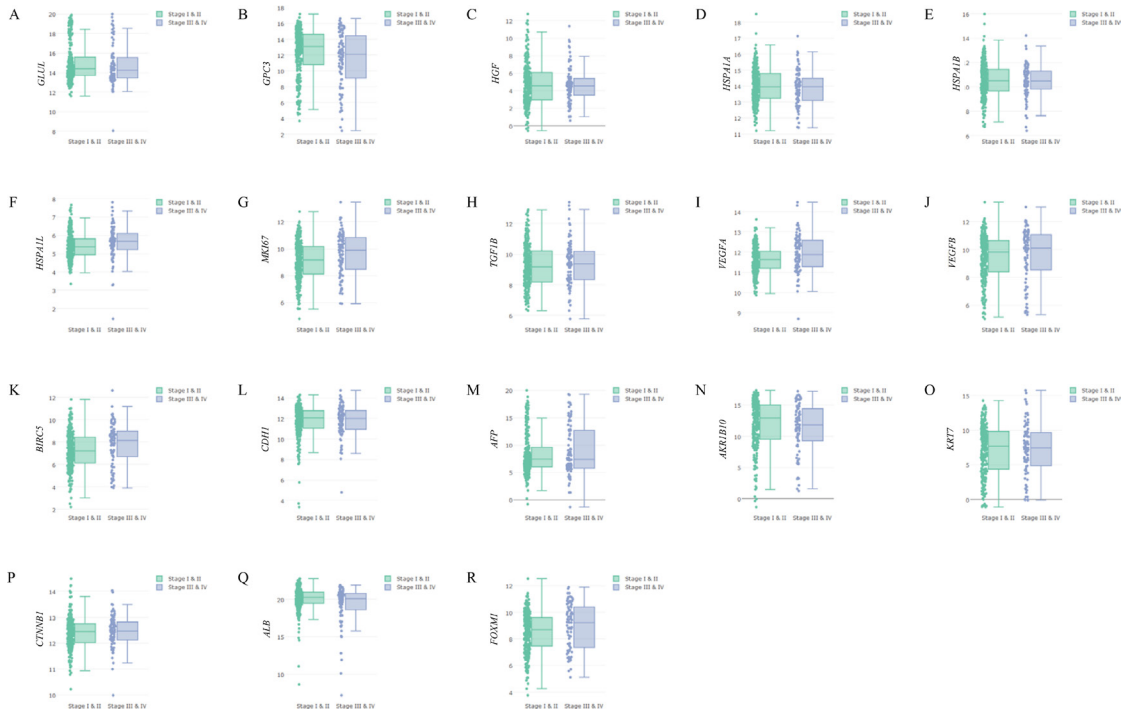

**Supplementary Figure 3: Association of gene expression (previously known prognostic genes) with clinical stages.** Relations between clinical stage and the expression levels of genes were examined using boxplots and scatterplots. Central lines in boxes represent medians, boxes show interquartile ranges (IQR), and error bars show the full range of values, excluding outliers defined as being more than  $\pm 1.5$ IQR outside boxes. Scatter plots represent raw data.

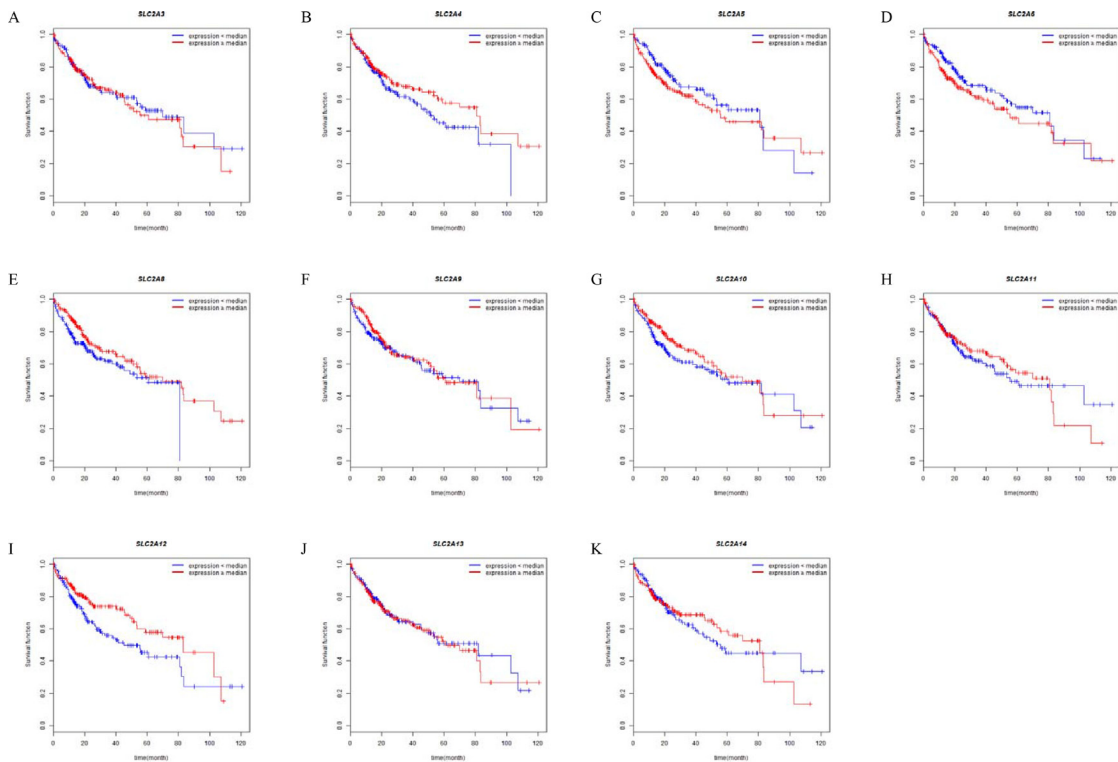

**Supplementary Figure 4: Kaplan-Meier survival curves of HCC patients stratified by expression levels of SLC2A family genes.** Overall survival analysis of HCC patients with respect to the expression levels of different genes was performed by Kaplan-Meier analysis. Expression levels are divided into low or high compared with the median (blue or red lines, respectively).

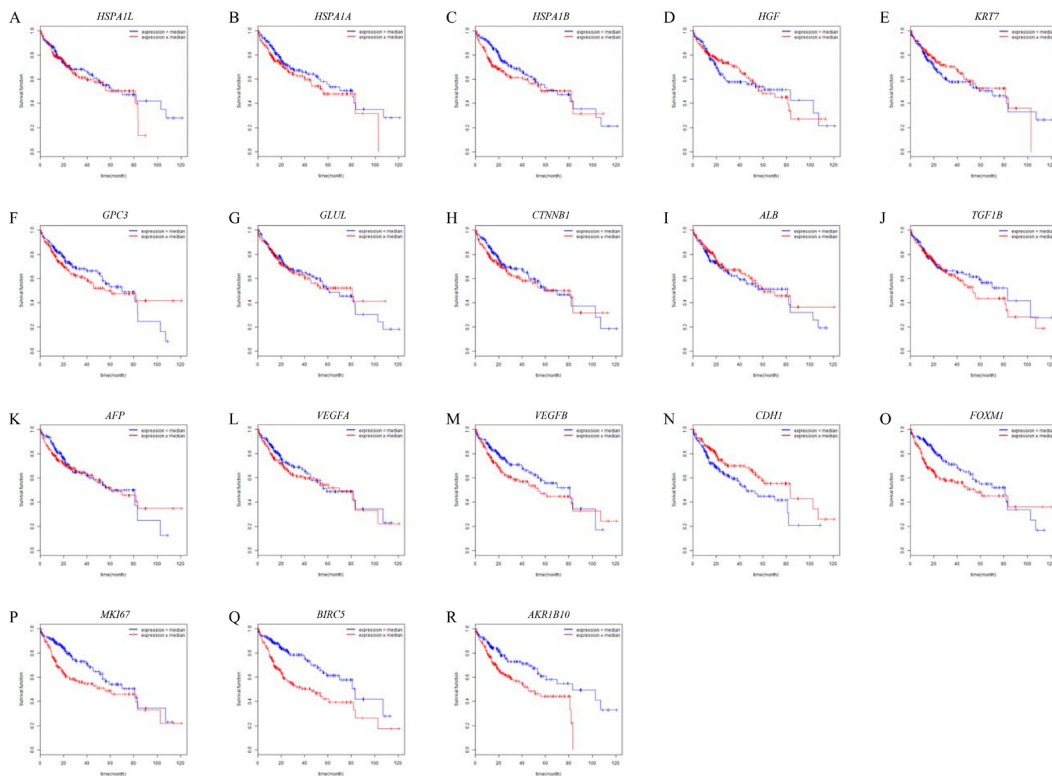

**Supplementary Figure 5: Kaplan-Meier survival curves of HCC patients stratified by expression levels of previously known prognostic genes.** Overall survival analysis of HCC patients with respect to the expression levels of different genes was performed by Kaplan-Meier analysis. Expression levels are divided into low or high compared with the median (blue or red lines, respectively).

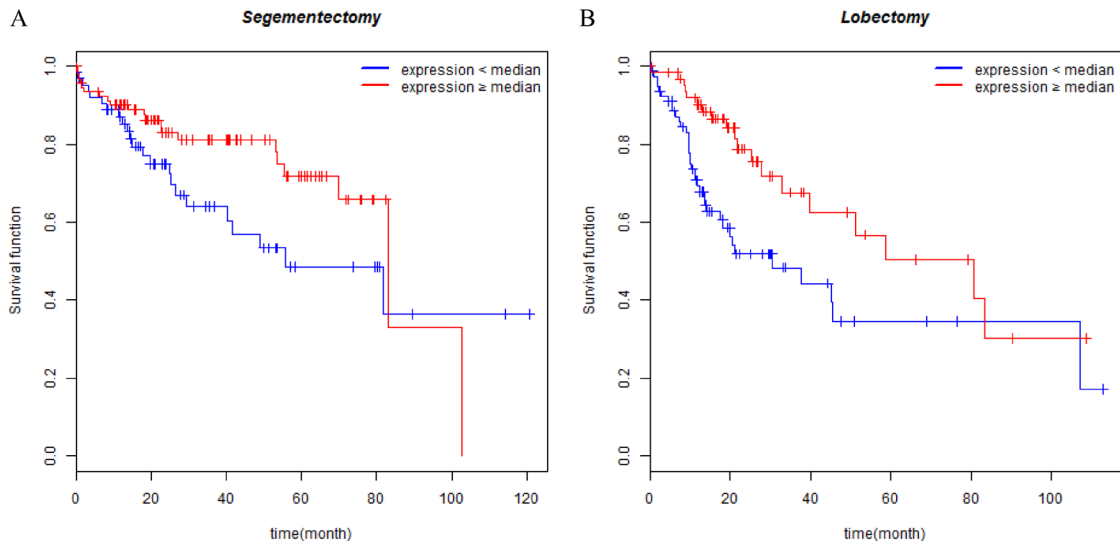

**Supplementary Figure 6: Kaplan-Meier survival curves of HCC patients stratified by expression levels of SLC2A2 in different surgery type (A) Segmentectomy (B) Lobectomy.**

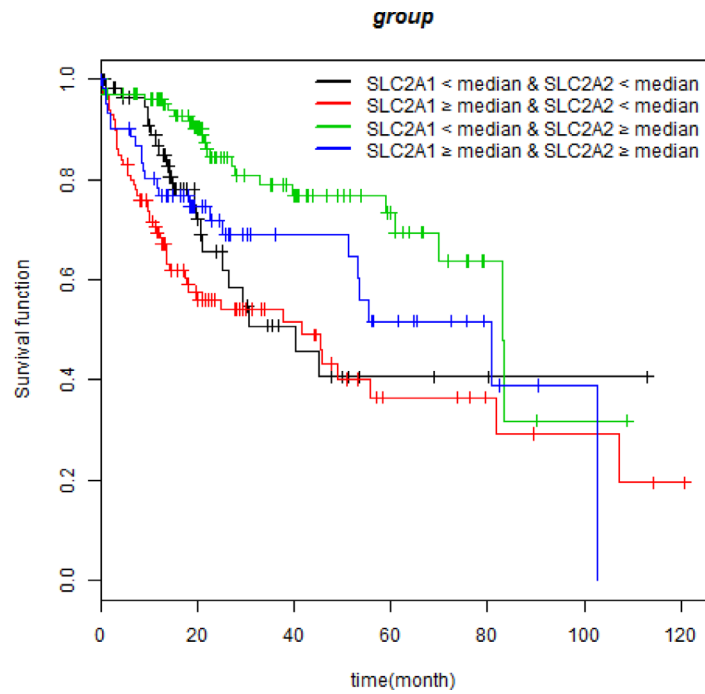

**Supplementary Figure 7: Kaplan-Meier survival curves of HCC patients stratified by expression levels of SLC2A1 with SLC2A2.**

**Supplementary Table 1: Two-sample location test results comparing stage 1 & II and stage III & IV on SLC2A family gene expression**

| Gene name      | Protein name           | p-value    | Test           |
|----------------|------------------------|------------|----------------|
| <i>SLC2A3</i>  | Glucose transporter 3  | 0.5598     | Mann-Whitney U |
| <i>SLC2A4</i>  | Glucose transporter 4  | 0.9914     | Mann-Whitney U |
| <i>SLC2A5</i>  | Glucose transporter 5  | 0.5582     | Mann-Whitney U |
| <i>SLC2A6</i>  | Glucose transporter 6  | 0.5048     | Mann-Whitney U |
| <i>SLC2A8</i>  | Glucose transporter 8  | 0.6690     | Mann-Whitney U |
| <i>SLC2A9</i>  | Glucose transporter 9  | < 0.001*** | Mann-Whitney U |
| <i>SLC2A10</i> | Glucose transporter 10 | 0.0666     | Mann-Whitney U |
| <i>SLC2A11</i> | Glucose transporter 11 | 0.5943     | Mann-Whitney U |
| <i>SLC2A12</i> | Glucose transporter 12 | 0.0037**   | Mann-Whitney U |
| <i>SLC2A13</i> | Glucose transporter 13 | 0.3856     | Mann-Whitney U |
| <i>SLC2A14</i> | Glucose transporter 14 | 0.5112     | Mann-Whitney U |

**Supplementary Table 2: Two-sample location test results comparing stage 1 & II and stage III & IV on known prognostic gene expression**

| Gene name      | Protein name                         | p-value  | Test           |
|----------------|--------------------------------------|----------|----------------|
| <i>GLUL</i>    | Glutamate synthetase                 | 0.1538   | Mann-Whitney U |
| <i>GPC3</i>    | Glypican 3                           | 0.0513   | Mann-Whitney U |
| <i>HGF</i>     | Hepatocyte growth factor             | 0.9271   | Mann-Whitney U |
| <i>HSPA1A</i>  | Heat shock protein 70                | 0.3292   | T-test         |
| <i>HSPA1B</i>  | Heat shock protein 70                | 0.8217   | Mann-Whitney U |
| <i>HSPA1L</i>  | Heat shock protein 70                | 0.0066** | Mann-Whitney U |
| <i>MKI67</i>   | Ki67                                 | 0.0093** | Mann-Whitney U |
| <i>TGF1B</i>   | Transforming growth factor-β         | 0.5530   | T-test         |
| <i>VEGFA</i>   | Vascular endothelial growth factor A | 0.0054** | Welch's t-test |
| <i>VEGFB</i>   | Vascular endothelial growth factor B | 0.2145   | Mann-Whitney U |
| <i>BIRC5</i>   | Survivin                             | 0.0072** | Mann-Whitney U |
| <i>CDH1</i>    | E-cadherin                           | 0.9687   | Mann-Whitney U |
| <i>AFP</i>     | Alpha-fetoprotein                    | 0.7938   | Mann-Whitney U |
| <i>AKR1B10</i> | Aldo-keto reductase family 1 B10     | 0.2571   | Mann-Whitney U |
| <i>KRT7</i>    | Cytokeratin-7                        | 0.8784   | Mann-Whitney U |
| <i>CTNNB1</i>  | β-catenin                            | 0.3805   | Mann-Whitney U |
| <i>ALB</i>     | Albumin                              | 0.0528   | Mann-Whitney U |
| <i>FOXM1</i>   | Forkhead box protein M1              | 0.0299*  | Mann-Whitney U |

**Supplementary Table 3: Comparison of SLC2A2 expression according to races**

| Race                             | Total | SLC2A2 expression (mean ± SD) |
|----------------------------------|-------|-------------------------------|
| White                            | 185   | 12.80 ± 1.93                  |
| Asian                            | 158   | 12.48 ± 2.39                  |
| Black or American                | 17    | 12.85 ± 0.95                  |
| American Indian or Alaska native | 2     | 10.22 ± 4.84                  |
| Unknown                          | 10    | 12.76 ± 1.60                  |

**Supplementary Table 4: Test for equality of survival distributions for the different levels of SLC2A family gene expression**

| Gene name      | Protein name           | Significance    | Median survival (months) |                 |
|----------------|------------------------|-----------------|--------------------------|-----------------|
|                |                        |                 | Low expression           | High expression |
| <i>SLC2A3</i>  | Glucose transporter 3  | No significance | <b>70.01</b>             | <b>55.35</b>    |
| <i>SLC2A4</i>  | Glucose transporter 4  | No significance | <b>51.25</b>             | <b>80.68</b>    |
| <i>SLC2A5</i>  | Glucose transporter 5  | No significance | <b>80.68</b>             | <b>55.65</b>    |
| <i>SLC2A6</i>  | Glucose transporter 6  | No significance | <b>80.68</b>             | <b>55.35</b>    |
| <i>SLC2A8</i>  | Glucose transporter 8  | No significance | <b>60.84</b>             | <b>70.01</b>    |
| <i>SLC2A9</i>  | Glucose transporter 9  | No significance | <b>70.01</b>             | <b>60.84</b>    |
| <i>SLC2A10</i> | Glucose transporter 10 | No significance | <b>60.84</b>             | <b>70.01</b>    |
| <i>SLC2A11</i> | Glucose transporter 11 | No significance | <b>60.84</b>             | <b>70.01</b>    |
| <i>SLC2A12</i> | Glucose transporter 12 | No significance | <b>55.35</b>             | <b>83.18</b>    |
| <i>SLC2A13</i> | Glucose transporter 13 | No significance | <b>81.67</b>             | <b>60.84</b>    |
| <i>SLC2A14</i> | Glucose transporter 14 | No significance | <b>53.29</b>             | <b>80.68</b>    |

**Supplementary Table 5: Test for equality of survival distributions for the different levels of previously known prognostic gene expression**

| Gene name      | Protein name                         | Significance ( <i>p</i> -value) | Median survival (months) |                 |
|----------------|--------------------------------------|---------------------------------|--------------------------|-----------------|
|                |                                      |                                 | Low expression           | High expression |
| <i>GLUL</i>    | Glutamate synthetase                 | No significance                 | <b>60.84</b>             | <b>80.68</b>    |
| <i>GPC3</i>    | Glypican 3                           | No significance                 | <b>70.01</b>             | <b>55.35</b>    |
| <i>HGF</i>     | Hepatocyte growth factor             | No significance                 | <b>83.18</b>             | <b>55.65</b>    |
| <i>HSPA1A</i>  | Heat shock protein 70                | No significance                 | <b>70.01</b>             | <b>55.35</b>    |
| <i>HSPA1B</i>  | Heat shock protein 70                | No significance                 | <b>70.01</b>             | <b>55.65</b>    |
| <i>HSPA1L</i>  | Heat shock protein 70                | No significance                 | <b>60.84</b>             | <b>80.68</b>    |
| <i>MKI67</i>   | Ki67                                 | Significance (0.0027**)         | <b>70.01</b>             | <b>55.35</b>    |
| <i>TGF1B</i>   | Transforming growth factor- $\beta$  | No significance                 | <b>83.18</b>             | <b>53.35</b>    |
| <i>VEGFA</i>   | Vascular endothelial growth factor A | No significance                 | <b>58.84</b>             | <b>70.01</b>    |
| <i>VEGFB</i>   | Vascular endothelial growth factor B | No significance                 | <b>80.68</b>             | <b>53.29</b>    |
| <i>BIRC5</i>   | Survivin                             | Significance (< 0.001***)       | <b>83.18</b>             | <b>37.75</b>    |
| <i>CDH1</i>    | E-cadherin                           | No significance                 | <b>53.29</b>             | <b>83.18</b>    |
| <i>AFP</i>     | Alpha-fetoprotein                    | No significance                 | <b>58.84</b>             | <b>60.84</b>    |
| <i>AKR1B10</i> | Aldo-keto reductase family 1 B10     | Significance (< 0.001***)       | <b>83.18</b>             | <b>45.07</b>    |
| <i>KRT7</i>    | Cytokeratin-7                        | No significance                 | <b>58.84</b>             | <b>80.68</b>    |
| <i>CTNNB1</i>  | $\beta$ -catenin                     | No significance                 | <b>70.01</b>             | <b>60.84</b>    |
| <i>ALB</i>     | Albumin                              | No significance                 | <b>80.68</b>             | <b>60.84</b>    |
| <i>FOXMI</i>   | Forkhead box protein M1              | Significance (< 0.001***)       | <b>80.68</b>             | <b>48.95</b>    |



**Supplementary Table 6: C-index and Area Under the Curve (AUC) at 5 years of SLC2A family gene expression**

| <b>Gene name</b> | <b>Protein name</b>    | <b>C-index</b> | <b>AUC at 5 years</b> |
|------------------|------------------------|----------------|-----------------------|
| <i>SLC2A3</i>    | Glucose transporter 3  | 0.503          | 0.499                 |
| <i>SLC2A4</i>    | Glucose transporter 4  | 0.580          | 0.657                 |
| <i>SLC2A5</i>    | Glucose transporter 5  | 0.608          | 0.567                 |
| <i>SLC2A6</i>    | Glucose transporter 6  | 0.543          | 0.588                 |
| <i>SLC2A8</i>    | Glucose transporter 8  | 0.562          | 0.515                 |
| <i>SLC2A9</i>    | Glucose transporter 9  | 0.531          | 0.479                 |
| <i>SLC2A10</i>   | Glucose transporter 10 | 0.553          | 0.522                 |
| <i>SLC2A11</i>   | Glucose transporter 11 | 0.520          | 0.590                 |
| <i>SLC2A12</i>   | Glucose transporter 12 | 0.519          | 0.548                 |
| <i>SLC2A13</i>   | Glucose transporter 13 | 0.522          | 0.522                 |
| <i>SLC2A14</i>   | Glucose transporter 14 | 0.508          | 0.562                 |

**Supplementary Table 7: C-index and Area Under the Curve (AUC) at 5 years of known prognostic gene expression**

| <b>Gene name</b> | <b>Protein name</b>                  | <b>C-index</b> | <b>AUC at 5 years</b> |
|------------------|--------------------------------------|----------------|-----------------------|
| <i>GLUL</i>      | Glutamate synthetase                 | 0.467          | 0.555                 |
| <i>GPC3</i>      | Glypican 3                           | 0.520          | 0.524                 |
| <i>HGF</i>       | Hepatocyte growth factor             | 0.525          | 0.490                 |
| <i>HSPA1A</i>    | Heat shock protein 70                | 0.536          | 0.542                 |
| <i>HSPA1B</i>    | Heat shock protein 70                | 0.545          | 0.541                 |
| <i>HSPA1L</i>    | Heat shock protein 70                | 0.521          | 0.504                 |
| <i>MKI67</i>     | Ki67                                 | 0.619          | 0.582                 |
| <i>TGF1B</i>     | Transforming growth factor- $\beta$  | 0.541          | 0.585                 |
| <i>VEGFA</i>     | Vascular endothelial growth factor A | 0.546          | 0.512                 |
| <i>VEGFB</i>     | Vascular endothelial growth factor B | 0.512          | 0.528                 |
| <i>BIRC5</i>     | Survivin                             | 0.629          | 0.623                 |
| <i>CDH1</i>      | E-cadherin                           | 0.584          | 0.558                 |
| <i>AFP</i>       | Alpha-fetoprotein                    | 0.555          | 0.511                 |
| <i>AKR1B10</i>   | Aldo-keto reductase family 1 B10     | 0.584          | 0.599                 |
| <i>KRT7</i>      | Cytokeratin-7                        | 0.544          | 0.519                 |
| <i>CTNNB1</i>    | $\beta$ -catenin                     | 0.554          | 0.417                 |
| <i>ALB</i>       | Albumin                              | 0.575          | 0.516                 |
| <i>FOXMI</i>     | Forkhead box protein M1              | 0.622          | 0.600                 |

**Supplementary Table 8: Tissue distribution and substrates binding affinity of GLUT isoforms**

| <b>Gene name</b> | <b>Protein name</b> | <b>Major site expression</b>                 | <b>High binding affinity</b> |
|------------------|---------------------|----------------------------------------------|------------------------------|
| <i>SLC2A1</i>    | GLUT 1              | Ubiquitous                                   | Glucose, FDG                 |
| <i>SLC2A2</i>    | GLUT 2              | Liver, islets, kidney, small intestine       | Glucosamine                  |
| <i>SLC2A3</i>    | GLUT 3              | Brain, nerve cells                           | Glucose, FDG                 |
| <i>SLC2A4</i>    | GLUT 4              | Muscle, fat, heart                           | Glucose, glucosamine         |
| <i>SLC2A5</i>    | GLUT 5              | Intestine, kidney, testis                    | Fructose                     |
| <i>SLC2A6</i>    | GLUT 6              | Spleen, leukocytes, brain                    | Cytochalasin B               |
| <i>SLC2A7</i>    | GLUT7               | Small intestine, colon, testis               | Fructose                     |
| <i>SLC2A8</i>    | GLUT 8              | Testis, brain, muscle, adipocyte, blastocyst | Glucose                      |
| <i>SLC2A9</i>    | GLUT 9              | Liver, kidney                                | -                            |
| <i>SLC2A10</i>   | GLUT 10             | Liver, pancreas                              | 2-Deoxy glucose              |
| <i>SLC2A11</i>   | GLUT 11             | Heart, muscle                                | -                            |
| <i>SLC2A12</i>   | GLUT 12             | Heart, prostate, mammary gland               | -                            |
| <i>SLC2A13</i>   | GLUT 13             | Brain                                        | <i>myo</i> -inositol         |
